# Supplementary material for: Visualization of plasmid delivery to keratinocytes in mouse and human epidermis
Source: PubMed Central journal article supplement — Sci Rep. 2011 Nov 15;1:158. doi: 10.1038/srep00158 (PMC3240989; doi:10.1038/srep00158), 2011-11-15

## Visualization of plasmid delivery to keratinocytes in mouse and human epidermis

Emilio González-González<sup>1,2</sup>, Yeu-Chun Kim<sup>5,6</sup>, Tycho J. Speaker<sup>7</sup>, Robyn P. Hickerson<sup>7</sup>, Ryan Spitler<sup>1,2,+</sup>, James C. Birchall<sup>8</sup>, Maria Fernanda Lara<sup>1,2</sup>, Rong-hua Hu<sup>9</sup>, Yanhua Liang<sup>9</sup>, Nancy Kirkiles-Smith<sup>10</sup>, Mark R. Prausnitz,<sup>5</sup> Leonard M. Milstone<sup>9</sup>, Christopher H. Contag<sup>1,2,3,4</sup>, and Roger L. Kaspar<sup>2,7#\*</sup>

**FIGURE S1. Real time imaging of single cells expressing hMGFP reporter under the control of the CMV promoter in mouse footpad skin.** **A.** Schematic representation of pCMV-hMGFP/CBL plasmid. **B,C.** *In vivo* imaging of hMGFP-positive keratinocytes following intradermal injection of pCMV-hMGFP/CBL into paw skin using the Lucid confocal fluorescence system (see Materials and Methods). Fluorescence mode (488 nm laser, left panel) images at 20.8 (**B**) and 32 (**C**)  $\mu\text{m}$  depths are shown together with their corresponding reflectance mode images (right panels). Scale bar is 100  $\mu\text{m}$ . **D.** Fluorescence microscopy of the skin sections obtained from previously imaged paws (see above panels **B** and **C**) injected with pCMV-hMGFP/CBL. Scale bar is 20  $\mu\text{m}$ . DAPI stain (blue) was used to identify cellular nuclei. Abbreviations: Ampr, ampicillin resistance; hMGFP, humanized Montastrea green fluorescence protein; CBL, click beetle luciferase; CMV, cytomegalovirus.

## **FIGURE S2: Immunofluorescence of the human skin xenograft/mouse skin border.**

**A.** Microscopy of a 10  $\mu\text{m}$  frozen skin section showing the junction of human and mouse skin stained with human keratin 1 antibody (red). **B.** Microscopy of a 10  $\mu\text{m}$  section showing the junction of human and mouse skin stained with mouse keratin 1 antibody (red). Top panels, brightfield-fluorescence overlay. Blue fluorescence from DAPI stains

shows nuclei. Scale bar is 20  $\mu\text{m}$ . **C.** Hematoxylin-eosin (H&E) staining of the human skin xenograft-mouse skin border. Microscopy of a 10  $\mu\text{m}$  section showing the junction (white dots) of human (right) and mouse (left) skin stained with hematoxylin-eosin. Scale bar is 20  $\mu\text{m}$ .

**FIGURE S3: Long-term reporter expression of following administration of pUbc-luc2/eGFP by microneedle arrays.** Representative bioluminescence image (see Materials and Methods) of pUbc-luc2/eGFP expression 72 days after application of metal microneedles (top) coated with DNA (0.6  $\mu\text{g}/\text{microneedle}$ ) or PAD (bottom) with less DNA (0.02  $\mu\text{g}/\text{microneedle}$ ). In vivo imaging of bioluminescence is a sensitive assay and this signal likely results from small numbers of transfected cells since GFP positive cells could not be found in the skin after 7 days.

**FIGURE S4: Temporal analysis of reporter expression following administration of pCMV-CBL/hMGFP by microneedle arrays.** Bioluminescence data of pCMV-CBL/hMGFP expression after application of metal microneedles coated with reporter plasmid DNA (0.6  $\mu\text{g}/\text{microneedle}$ ) or PAD with less reporter plasmid DNA (0.02  $\mu\text{g}/\text{microneedle}$ ). Controls are salmon sperm DNA (metal) and  $\beta$ -gal plasmid DNA (PAD).

**SUPPLEMENTAL VIDEO FILE 1: Video of eGFP expression 24 h after intradermal (ID) injection of pUbc-luc2/eGFP plasmid in mouse footpad using the**

**VivaScope 2500 (Lucid) confocal fluorescence microscope.** A 2D image stack video of the corresponding 3-D image in Fig. 2 was created with ImageJ software. 2D en face images are translated in depth from the surface to 64  $\mu\text{m}$  depth.

**SUPPLEMENTAL VIDEO FILE 2: Video of hMGFP expression 24 h after ID injection of pCMV-hMGFP/CBL plasmid in mouse footpad using the VivaScope 2500 (Lucid) confocal fluorescence microscope.** A 2D image stack video of the corresponding en face image in Fig. S1 was created with ImageJ software. 2D en face images are translated in depth from the surface to 64  $\mu\text{m}$  deep.

**SUPPLEMENTAL VIDEO FILE 3: Video of eGFP expression 24 h after injection of pUbc-luc2/eGFP plasmid in human skin xenografts using the VivaScope 2500 (Lucid) confocal fluorescence microscope.** A 2D image stack video of the corresponding en face image in Fig. 3 was created with Image J software. 2D en face images are translated in depth from the surface to 64  $\mu\text{m}$  depth.

**FIGURE S1**

**A**

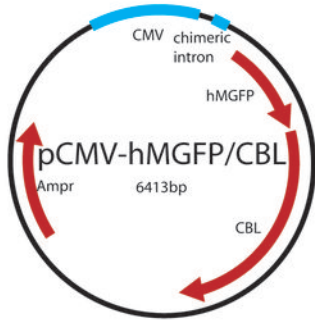

**B**

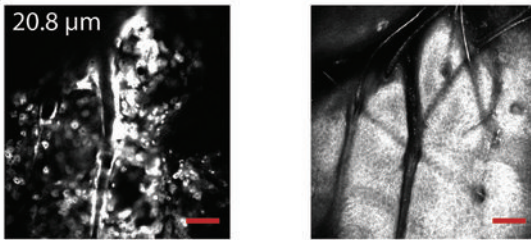

**C**

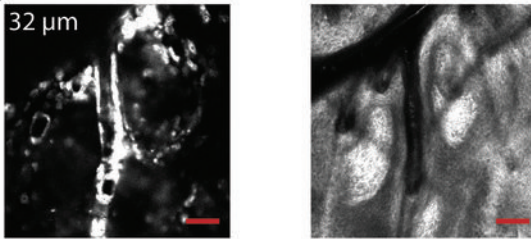

**D**

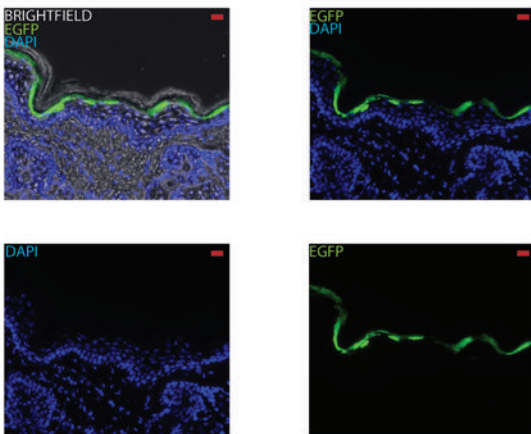

**FIGURE S2**

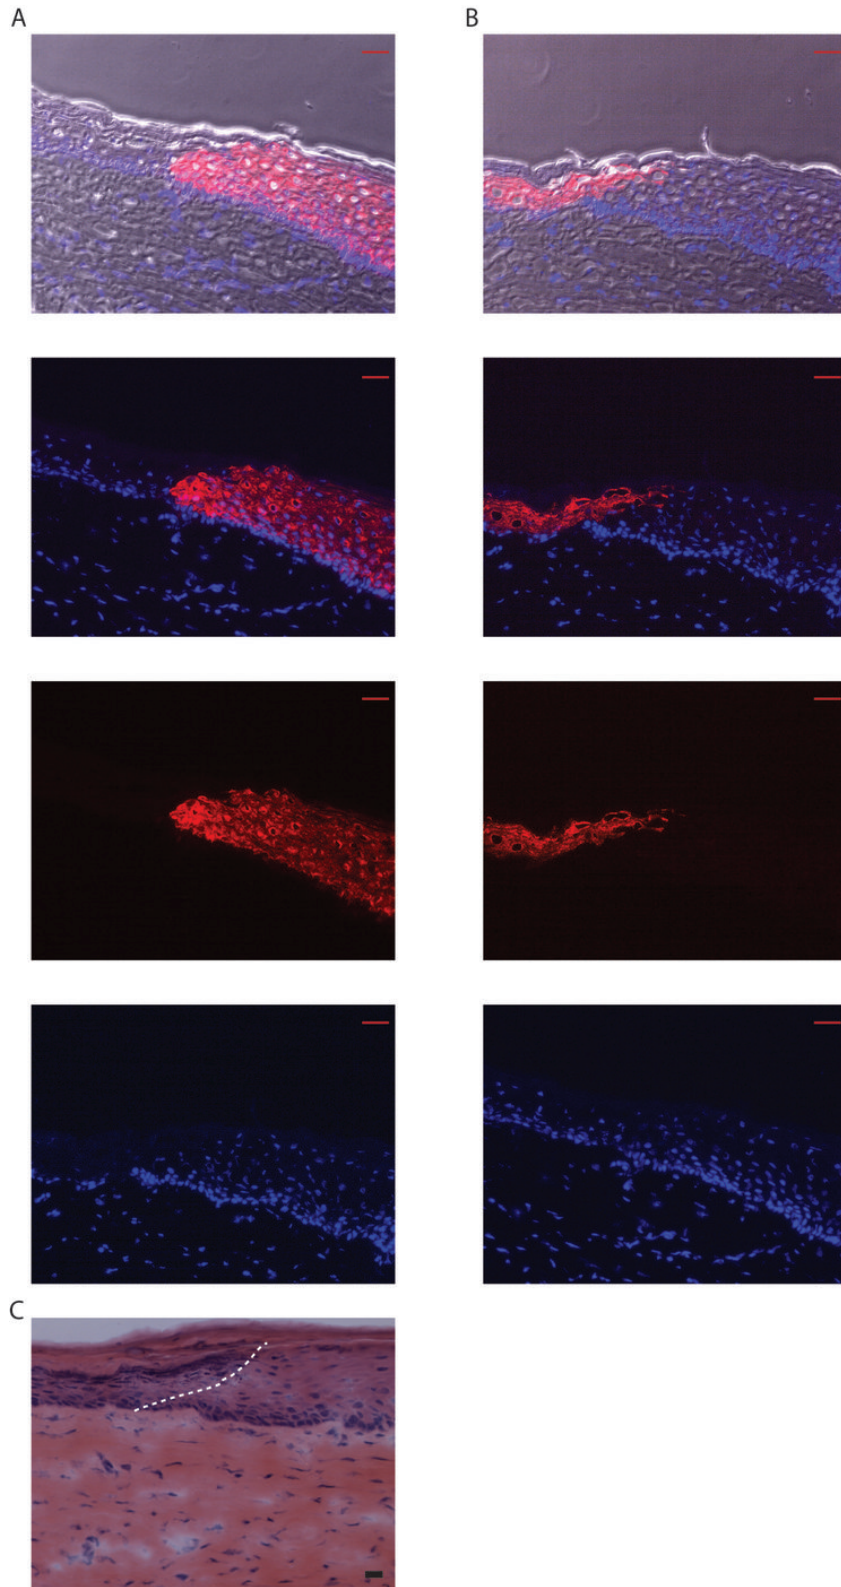

**FIGURE S3**

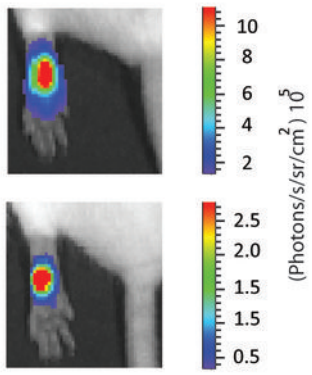

**FIGURE S4**

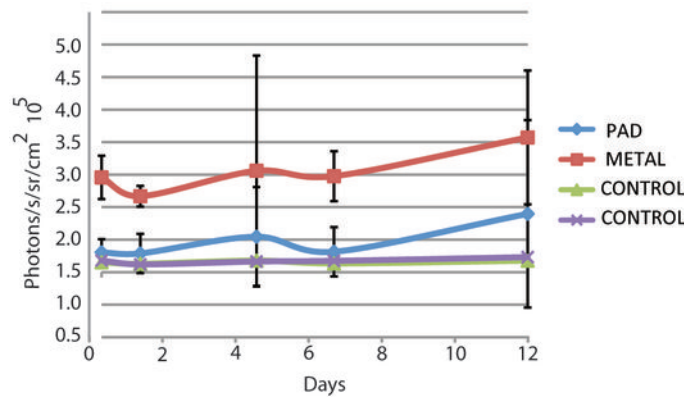

Supplement: srep00158-s1.pdf [file srep00158-s1.pdf]
